# Supplementary material for: WGS based study of the population structure of Salmonella enterica serovar Infantis
Source: PubMed Central journal article supplement (PMC6858691; doi:10.1186/s12864-019-6260-6), 2019-11-15
Supplement: 12864_2019_6260_MOESM1_ESM.pdf [file 12864_2019_6260_MOESM1_ESM.pdf]

# Table S1

| Strain ID   | Year    | Host        | Host details               | Country attributed from travel | Country of isolation | MLST - 7 gene   | Phenotypic resistance profile | ResFinder v. 3.2.                                                     | PlasmidFinder              | Cluster    |
|-------------|---------|-------------|----------------------------|--------------------------------|----------------------|-----------------|-------------------------------|-----------------------------------------------------------------------|----------------------------|------------|
| 00_Avian    | 2000    | Avian       | Chicken meat               | Japan                          | Japan                | 32              | SSuTmNe                       | aph(3')-Ia,aadA1,sul1,tet(A),dfrA14                                   | IncFIB(pENTAS01)-pSEI-like | cluster 1  |
| 00_Hum1     | 2000    | Human       |                            | Unknown                        | Unknown              | 32              | Sensitive                     |                                                                       |                            | cluster 3  |
| 00_Hum2     | 2000    | Human       | Asymptomatic carrier       | Japan                          | Japan                | 32              | Sensitive                     |                                                                       |                            | cluster 3  |
| 00_Hum3     | 2000    | Human       | Asymptomatic carrier       | Japan                          | Japan                | 32              | Sensitive                     |                                                                       |                            | cluster 8  |
| 00_Reptile  | 2000    | Reptile     | Snake                      | Germany                        | Germany              | 32              | Sensitive                     |                                                                       |                            | cluster 2  |
| 02_Avian    | 2002    | Avian       | Imported duck              | Denmark*                       | Denmark*             | 32              | Sensitive                     |                                                                       |                            | cluster 8  |
| 02_Hum1     | 2002    | Human       | Faeces                     | Denmark                        | Denmark              | 32              | Sensitive                     |                                                                       |                            | cluster 3  |
| 02_Hum2     | 2002    | Human       | Blood                      | Denmark                        | Denmark              | 32              | Sensitive                     |                                                                       |                            | cluster 2  |
| 02_Hum3     | 2002    | Human       | Faeces                     | Denmark                        | Denmark              | 32              | Sensitive                     |                                                                       |                            | cluster 2  |
| 02_Hum4     | 2002    | Human       | Faeces                     | Greece                         | Denmark              | 32              | Sensitive                     |                                                                       |                            | cluster 2  |
| 02_Swine1   | 2002    | Swine       | Fresh meat                 | Denmark                        | Denmark              | 32              | Sensitive                     |                                                                       |                            | cluster 2  |
| 02_Swine2   | 2002    | Swine       | Fresh meat                 | Denmark                        | Denmark              | 32              | A                             | blaTEM-1B                                                             | IncI1                      | cluster 2  |
| 03_Hum1     | 2003    | Human       | Culture                    | Denmark                        | Denmark              | 32              | Sensitive                     |                                                                       |                            | cluster 3  |
| 03_Hum2     | 2003    | Human       | Culture                    | Unknown                        | Denmark              | 1823            | Sensitive                     |                                                                       |                            | Distant ST |
| 04_Environ  | 2004    | Environment | Water                      | Benin                          | Benin                | 603             | Sensitive                     |                                                                       |                            | Distant ST |
| 04_Food     | 2004    | Food        | Food                       | Germany                        | Germany              | 1032            | Sensitive                     |                                                                       |                            | cluster 5  |
| 04_Hum1     | 2004    | Human       | Faeces                     | Denmark                        | Denmark              | 32              | Sensitive                     |                                                                       |                            | cluster 2  |
| 04_Hum2     | 2004    | Human       | Faeces                     | Denmark                        | Denmark              | 32              | Sensitive                     |                                                                       |                            | cluster 2  |
| 04_Hum3     | 2004    | Human       | Faeces                     | Denmark                        | Denmark              | 32              | Sensitive                     |                                                                       |                            | cluster 2  |
| 04_Hum4     | 2004    | Human       | Faeces                     | Denmark                        | Denmark              | 32              | Sensitive                     |                                                                       |                            | cluster 1  |
| 04_Hum5     | 2004    | Human       | Faeces                     | Caribbean                      | Denmark              | 32              | Sensitive                     |                                                                       |                            | cluster 2  |
| 04_Hum6     | 2004    | Human       | Faeces                     | Taiwan                         | Taiwan               | 603             | Sensitive                     |                                                                       |                            | Distant ST |
| 04_Swine    | 2004    | Swine       |                            | Ireland                        | Ireland              | 32              | ASSuTm                        | aph(3')-Ib,aph(6)-Id,aadA1,blaTEM-1B,mph(8),sul1,sul2,tet(B),dfrA1    | IncHI2A,IncHI2,TrfA,IncQ1  | cluster 3  |
| 05_Avian1   | 2005    | Avian       |                            | Denmark                        | Denmark              | 32              | Sensitive                     |                                                                       |                            | cluster 1  |
| 05_Avian2   | 2005    | Avian       | Fresh meat                 | Denmark                        | Denmark              | 32              | Sensitive                     |                                                                       |                            | cluster 8  |
| 05_Feed     | 2005    | Feed        | Feed                       | Denmark                        | Denmark              | 32              | Sensitive                     |                                                                       |                            | cluster 3  |
| 05_Swine1   | 2005    | Swine       | Intestine                  | Denmark                        | Denmark              | 1824            | Sensitive                     |                                                                       |                            | cluster 7  |
| 05_Swine2   | 2005    | Swine       |                            | Denmark                        | Denmark              | 32              | Sensitive                     |                                                                       |                            | cluster 1  |
| 06_Avian    | 2006    | Avian       | Imported chicken           | Denmark*                       | Denmark*             | 32              | SSuTCiNx                      | aadA1,sul1,tet(A),gyrA p.S83Y,parC p.T57S                             | IncFIB(pENTAS01)-pSEI-like | cluster 1  |
| 06_Bovine   | 2006    | Bovine      | Liver                      | Denmark                        | Denmark              | 32              | Sensitive                     |                                                                       |                            | cluster 2  |
| 06_Environ  | 2006    | Environment | River                      | USA                            | USA                  | 32              | Sensitive                     |                                                                       |                            | cluster 3  |
| 06_Feed1    | 2006    | Feed        | Feed                       | Denmark                        | Denmark              | 32              | Sensitive                     |                                                                       |                            | cluster 2  |
| 06_Feed2    | 2006    | Feed        | Animal feed                | United Kingdom                 | Northern Ireland     | 32              | Sensitive                     |                                                                       |                            | cluster 8  |
| 06_Hum1     | 2006    | Human       |                            | Netherlands                    | Netherlands          | 32-hisD deleted | Sensitive                     |                                                                       |                            | cluster 2  |
| 06_Hum2     | 2006    | Human       | Blood                      | Ireland                        | Ireland              | 32              | SSuTCiNx                      | aadA1,sul1,tet(A),gyrA p.S83Y,parC p.T57S                             | IncFIB(pENTAS01)-pSEI-like | cluster 1  |
| 06_Hum3     | 2006    | Human       | Faeces                     | India                          | Denmark              | 1825            | ATTmCiNx                      | tet(A),blaTEM-1B,dfrA1,gyrA p.S83F,parC p.T57S                        |                            | cluster 3  |
| 06_Swine    | 2006    | Swine       | pork                       | Denmark                        | Denmark              | 32              | Sensitive                     |                                                                       | IncX1, Col156              | cluster 4  |
| 07_Avian    | 2007    | Avian       | Chicken                    | United Kingdom                 | Northern Ireland     | 32              | Sensitive                     |                                                                       |                            | cluster 8  |
| 07_Feed     | 2007    | Feed        | Feed                       | Denmark                        | Denmark              | 32              | Sensitive                     |                                                                       |                            | cluster 7  |
| 07_Hum1     | 2007    | Human       |                            | Taiwan                         | Taiwan               | 32              | Sensitive                     |                                                                       |                            | cluster 2  |
| 07_Hum2     | 2007    | Human       | Faeces                     | Iran                           | Denmark              | 32              | SSuTmNeCiNx                   | aadA1,aph(3')-Ia,sul1,tet(A),dfrA14,gyrA p.D87N,parC p.T57S           | IncFIB(pENTAS01)-pSEI-like | cluster 1  |
| 07_Hum3     | 2007    | Human       | Faeces                     | Unknown                        | Denmark              | 32              | SSuTmNeCiNx                   | aadA1,aph(3')-Ia,sul1,tet(A),dfrA14,gyrA p.S83Y,parC p.T57S           | IncFIB(pENTAS01)-pSEI-like | cluster 1  |
| 07_Hum4     | 2007    | Human       | Faeces                     | Denmark                        | Denmark              | 32              | CiNx                          | gyrA p.S83F,parC p.T57S                                               |                            | cluster 2  |
| 07_Hum5     | 2007    | Human       | Faeces                     | Morocco                        | Denmark              | 32              | Sensitive                     |                                                                       |                            | cluster 2  |
| 07_Swine1   | 2007    | Swine       | Lungs                      | Denmark                        | Denmark              | 32              | Sensitive                     |                                                                       |                            | cluster 7  |
| 07_Swine2   | 2007    | Swine       | Lymphnode                  | Denmark                        | Denmark              | 32              | Sensitive                     |                                                                       |                            | cluster 7  |
| 08_Avian    | 2008    | Avian       | Imported duck              | Denmark*                       | Denmark*             | 32              | Sensitive                     |                                                                       |                            | cluster 1  |
| 08_Environ1 | 2008    | Environment | Stable environment-poultry | Denmark                        | Denmark              | 32              | Sensitive                     |                                                                       |                            | cluster 2  |
| 08_Environ2 | 2008    | Environment | Stable environment-poultry | Denmark                        | Denmark              | 32              | Sensitive                     |                                                                       | Col8282                    | cluster 2  |
| 08_Hum1     | 2008    | Human       | Faeces                     | Venezuela                      | Denmark              | 32              | Sensitive                     |                                                                       |                            | cluster 1  |
| 08_Hum2     | 2008    | Human       | Faeces                     | Turkey                         | Denmark              | 32              | SSuTmNeCiNx                   | aadA1,aph(3')-Ia,sul1,tet(A),dfrA14,gyrA p.S83Y,parC p.T57S           | IncFIB(pENTAS01)-pSEI-like | cluster 1  |
| 08_Hum3     | 2008    | Human       | Faeces                     | Cuba                           | Denmark              | 32              | Sensitive                     |                                                                       |                            | cluster 2  |
| 08_Hum4     | 2008    | Human       | Faeces                     | South Africa                   | Denmark              | 32              | CSSuTmFfn                     | aph(3')-Ib,aph(6)-Id,flor,sul2,tet(A)                                 | IncA/C2                    | cluster 8  |
| 08_Hum5     | 2008    | Human       | Faeces                     | Unknown                        | Denmark              | 32              | CiNx                          | gyrA p.S83F,parC p.T57S                                               |                            | cluster 2  |
| 08_Hum6     | 2008    | Human       | Faeces                     | Bulgaria                       | Denmark              | 32              | Sensitive                     |                                                                       |                            | cluster 3  |
| 08_Hum7     | 2008    | Human       | Faeces                     | Tunisia                        | Denmark              | 32              | Sensitive                     |                                                                       |                            | cluster 3  |
| 08_Hum8     | 2008    | Human       | Faeces                     | Greece                         | Denmark              | 32              | SSuTCiNx                      | aadA1,sul1,tet(A),gyrA p.S83Y,parC p.T57S                             | IncFIB(pENTAS01)-pSEI-like | cluster 1  |
| 08_Swine1   | 2008    | Swine       | Imported pork              | Denmark*                       | Denmark*             | 32              | Sensitive                     |                                                                       | IncFIB(pHCM2)              | cluster 7  |
| 08_Swine2   | 2008    | Swine       |                            | Denmark                        | Denmark              | 32              | ASSuTm                        | aadA1,sul1,tet(A),dfrA14,gyrA p.S83Y,parC p.T57S                      | IncI1,IncQ1                | cluster 4  |
| 09_Bovine1  | 2009    | Bovine      | Raw Meat                   | Ireland                        | Ireland              | 32              | ASuTmCiNx                     | blaTEM-1B,sul2,dfrA1,gyrA p.S83Y,parC p.T57S                          | IncI1                      | cluster 3  |
| 09_Bovine2  | 2009    | Bovine      | Fresh meat                 | Denmark*                       | Denmark*             | 32              | Sensitive                     |                                                                       |                            | cluster 7  |
| 09_Environ1 | 2009    | Environment | Stable environment-poultry | Denmark                        | Denmark              | 32              | Sensitive                     |                                                                       |                            | cluster 4  |
| 09_Environ2 | 2009    | Environment | River (Thames River)       | United Kingdom                 | United Kingdom       | 32              | Sensitive                     |                                                                       |                            | cluster 6  |
| 09_Hum1     | 2009    | Human       | Faeces                     | Pakistan                       | Denmark              | 32              | ACSuTmGCiNx                   | ant(2'')-Ia,blaTEM-1B,cmlA1,sul1,tet(A),dfrA1,gyrA p.D87Y,parC p.T57S |                            | cluster 3  |
| 09_Hum2     | 2009    | Human       | Faeces                     | Thailand                       | Denmark              | 32              | Sensitive                     |                                                                       |                            | cluster 7  |
| 09_Hum3     | 2009    | Human       | Faeces                     | Egypt                          | Denmark              | 32              | SSuTCiNx                      | aadA1,sul1,tet(A),gyrA p.D87G,parC p.T57S                             | IncFIB(pENTAS01)-pSEI-like | cluster 1  |
| 09_Hum4     | 2009    | Human       | Culture                    | Denmark                        | Denmark              | 32              | Sensitive                     |                                                                       |                            | cluster 6  |
| 09_Hum5     | 2009    | Human       | Faeces                     | Denmark                        | Denmark              | 32              | CiNx                          | gyrA p.S83F,parC p.T57S                                               |                            | cluster 2  |
| 09_Plant    | 2009    | Plant       | Soya Spruce                | Netherlands                    | Netherlands          | 32              | Sensitive                     |                                                                       |                            | cluster 3  |
| 09_Swine    | 2009    | Swine       | Fresh meat                 | Denmark                        | Denmark              | 32              | Sensitive                     |                                                                       |                            | cluster 4  |
| 10_Avian    | 2010    | Avian       |                            | Denmark                        | Denmark              | 32              | Sensitive                     |                                                                       |                            | cluster 2  |
| 10_Environ  | 2010    | Environment | Stable environment-poultry | Denmark                        | Denmark              | 32              | Sensitive                     |                                                                       |                            | cluster 8  |
| 10_Feed     | 2010    | Feed        | Feed                       | Denmark                        | Denmark              | 32              | Sensitive                     |                                                                       |                            | cluster 1  |
| 10_Hum1     | 2010    | Human       | Faeces                     | Denmark                        | Denmark              | 32              | Sensitive                     |                                                                       |                            | cluster 1  |
| 10_Hum10    | 2010    | Human       | Faeces                     | Egypt                          | Denmark              | 32              | Sensitive                     |                                                                       |                            | cluster 1  |
| 10_Hum2     | 2010    | Human       | Faeces                     | Denmark                        | Denmark              | 32              | Sensitive                     |                                                                       |                            | cluster 1  |
| 10_Hum3     | 2010    | Human       | Faeces                     | Denmark                        | Denmark              | 32              | Sensitive                     |                                                                       |                            | cluster 1  |
| 10_Hum4     | 2010    | Human       | Faeces                     | Denmark                        | Denmark              | 32              | S                             |                                                                       |                            | cluster 1  |
| 10_Hum5     | 2010    | Human       | Faeces                     | Denmark                        | Denmark              | 32              | Sensitive                     |                                                                       |                            | cluster 1  |
| 10_Hum6     | 2010    | Human       | Faeces                     | Lebanon                        | Denmark              | 32              | Sensitive                     |                                                                       |                            | cluster 2  |
| 10_Hum7     | 2010    | Human       | Faeces                     | Poland                         | Denmark              | 32              | SSuTCiNx                      | aadA1,sul1,tet(A),gyrA p.S83Y,parC p.T57S                             | IncFIB(pENTAS01)-pSEI-like | cluster 1  |
| 10_Hum8     | 2010    | Human       | Faeces                     | Iran                           | Denmark              | 32              | SSuTmCiNx                     | aadA1,sul1,dfrA14,gyrA p.D87N,parC p.T57S                             | IncFIB(pENTAS01)-pSEI-like | cluster 1  |
| 10_Hum9     | 2010    | Human       | Faeces                     | Denmark                        | Denmark              | 32              | SSuTmG                        | aadA1,aac(3)-Ia,dfrA1,sul1                                            | IncI1                      | cluster 1  |
| 10_Swine    | 2010    | Swine       | Fresh meat                 | Denmark                        | Denmark              | 32              | Sensitive                     |                                                                       |                            | cluster 8  |
| 11_Avian    | 2011    | Avian       | Fresh meat                 | Denmark                        | Denmark              | 32              | SSuTCiNx                      | aadA1,sul1,tet(A),gyrA p.S83Y,parC p.T57S                             | IncFIB(pENTAS01)-pSEI-like | cluster 1  |
| 11_Feed     | 2011    | Feed        | Feed                       | Denmark                        | Denmark              | 32              | Sensitive                     |                                                                       |                            | cluster 3  |
| 11_Hum1     | 2011    | Human       | Faeces                     | Nepal                          | Denmark              | 32              | SSuTmNeCiNx                   | aadA1,aph(3')-Ia,sul1,tet(A),dfrA14,gyrA p.D87G,parC p.T57S           | IncFIB(pENTAS01)-pSEI-like | cluster 1  |
| 11_Hum2     | 2011    | Human       | Faeces                     | Turkey                         | Denmark              | 32              | SSuTmCiNx                     | aadA1,sul1,tet(A),dfrA14,gyrA p.S83Y,parC p.T57S                      | IncFIB(pENTAS01)-pSEI-like | cluster 1  |
| 11_Hum3     | 2011    | Human       | Faeces                     | India                          | Denmark              | 32              | SSuTmNeCiNx                   | aadA1,aph(3')-Ia,sul1,tet(A),dfrA14,gyrA p.D87G,parC p.T57S           | IncFIB(pENTAS01)-pSEI-like | cluster 1  |
| 11_Hum4     | 2011    | Human       | Faeces                     | India                          | Denmark              | 32              | CSuGCiNx                      | ant(2'')-Ia,cmlA1,sul1,gyrA p.D87Y,parC p.T57S                        | IncI1                      | cluster 3  |
| 11_Hum5     | 2011    | Human       | Faeces                     | Denmark                        | Denmark              | 32              | Sensitive                     |                                                                       |                            | cluster 4  |
| 11_Hum6     | 2011    | Human       | Faeces                     | Unknown                        | Denmark              | 32              | SSuTCiNx                      | aadA1,sul1,tet(A),gyrA p.S83Y,parC p.T57S                             | IncFIB(pENTAS01)-pSEI-like | cluster 1  |
| 11_Hum7     | 2011    | Human       | Faeces                     | South Africa                   | Denmark              | 603             | Sensitive                     |                                                                       |                            | Distant ST |
| 12_Environ  | 2012    | Environment | Stable environment-poultry | Denmark                        | Denmark              | 32              | ASTNe                         | aph(3')-Ia,aph(3')-Ib,aph(6)-Id,blaTEM-1A,tet(B)                      | IncI1,IncX4                | cluster 1  |
| 12_Hum1     | 2012    | Human       | Faeces                     | Denmark                        | Denmark              | 32              | Sensitive                     |                                                                       |                            | cluster 3  |
| 12_Hum2     | 2012    | Human       | Faeces                     | Denmark                        | Denmark              | 32              | Sensitive                     |                                                                       |                            | cluster 3  |
| 85_Hum      | 1985    | Human       | Human carrier              | Germany                        | Germany              | 32              | Sensitive                     |                                                                       |                            | cluster 3  |
| 98_Reptile  | 1998    | Reptile     | Snake                      | Germany                        | Germany              | 32              | Sensitive                     |                                                                       |                            | cluster 2  |
| 99_Avian    | 1999    | Avian       | Chicken meat               | Japan                          | Japan                | 32              | SSuTmNe                       | aadA1,aph(3')-Ia,sul1,tet(A),dfrA14                                   | IncFIB(pENTAS01)-pSEI-like | cluster 1  |
| 99_Environ  | 1999    | Environment | GP center (egg packaging)  | Japan                          | Japan                | 32              | Sensitive                     |                                                                       |                            | cluster 2  |
| 99_Hum      | 1999    | Human       | Faeces                     | Greece                         | Denmark              | 32              | Sensitive                     |                                                                       |                            | cluster 3  |
| Kauffman1   | Unknown | Unknown     |                            | Unknown                        | Unknown              | 32              | Sensitive                     |                                                                       |                            | cluster 2  |
| Kauffman3   | 1961    | Unknown     |                            | Unknown                        | Unknown              | 32              | Sensitive                     |                                                                       |                            | cluster 3  |
| Kauffman4   | 1943    | Unknown     |                            | Unknown                        | Unknown              | 493             | Sensitive                     |                                                                       |                            | Distant ST |
| SARB26      | Unknown | Human       | Human                      | USA                            | USA                  | 32              | Sensitive                     |                                                                       |                            | cluster 2  |

\* - imported meat

**Resistance abriviations**

|                       |
|-----------------------|
| A = Ampillicin        |
| C = Chloramphenicol   |
| Ci = Ciprofloxacin    |
| Ffn = Florfenicol     |
| G = Gentamicin        |
| Nx = Nalidixic acid   |
| Ne = Neomycin         |
| S = Streptomycin      |
| Su = Sulfamethoxazole |
| T = Tetracycline      |
| Tm = Trimethoprim     |

Table S2

Q-values for Structure analysis

\* Strain with questionable Q-values

| Main lineage |           |       |       |       |       |       |
|--------------|-----------|-------|-------|-------|-------|-------|
| Strain ID    | Cluster   | Fst_1 | Fst_2 | Fst_3 | Fst_4 | Fst_5 |
| 04_Hum4*     | cluster 1 | 0.010 | 0.001 | 0.692 | 0.262 | 0.034 |
| 10_Feed*     | cluster 1 | 0.031 | 0.000 | 0.679 | 0.272 | 0.017 |
| 12_Environ*  | cluster 1 | 0.007 | 0.001 | 0.690 | 0.289 | 0.013 |
| 08_Hum1*     | cluster 1 | 0.079 | 0.001 | 0.685 | 0.226 | 0.009 |
| 05_Swine2*   | cluster 1 | 0.020 | 0.000 | 0.675 | 0.292 | 0.012 |
| 10_Hum1      | cluster 1 | 0.000 | 0.000 | 0.996 | 0.002 | 0.001 |
| 10_Hum2      | cluster 1 | 0.002 | 0.000 | 0.994 | 0.002 | 0.002 |
| 10_Hum3      | cluster 1 | 0.000 | 0.000 | 0.997 | 0.001 | 0.001 |
| 10_Hum4      | cluster 1 | 0.000 | 0.000 | 0.997 | 0.001 | 0.001 |
| 10_Hum5      | cluster 1 | 0.001 | 0.000 | 0.995 | 0.002 | 0.001 |
| 00_Poultry   | cluster 1 | 0.081 | 0.000 | 0.915 | 0.001 | 0.002 |
| 06_Poultry   | cluster 1 | 0.083 | 0.000 | 0.915 | 0.000 | 0.001 |
| 08_Avian     | cluster 1 | 0.079 | 0.000 | 0.917 | 0.003 | 0.001 |
| 05_Poultry1  | cluster 1 | 0.011 | 0.000 | 0.987 | 0.001 | 0.001 |
| 99_Poultry   | cluster 1 | 0.073 | 0.000 | 0.923 | 0.002 | 0.001 |
| 06_Hum2      | cluster 1 | 0.044 | 0.000 | 0.955 | 0.000 | 0.001 |
| 11_Poultry   | cluster 1 | 0.124 | 0.000 | 0.874 | 0.001 | 0.001 |
| 07_Hum2      | cluster 1 | 0.077 | 0.000 | 0.919 | 0.002 | 0.001 |
| 07_Hum3      | cluster 1 | 0.146 | 0.000 | 0.850 | 0.002 | 0.001 |
| 08_Hum2      | cluster 1 | 0.111 | 0.000 | 0.885 | 0.002 | 0.001 |
| 09_Hum3      | cluster 1 | 0.126 | 0.000 | 0.870 | 0.001 | 0.003 |
| 10_Hum7      | cluster 1 | 0.078 | 0.000 | 0.920 | 0.001 | 0.000 |
| 10_Hum8      | cluster 1 | 0.161 | 0.000 | 0.836 | 0.002 | 0.001 |
| 10_Hum9      | cluster 1 | 0.000 | 0.000 | 0.997 | 0.002 | 0.001 |
| 10_Hum10     | cluster 1 | 0.001 | 0.000 | 0.996 | 0.002 | 0.001 |
| 11_Hum1      | cluster 1 | 0.126 | 0.000 | 0.871 | 0.002 | 0.001 |
| 11_Hum2      | cluster 1 | 0.128 | 0.000 | 0.868 | 0.002 | 0.001 |
| 11_Hum3      | cluster 1 | 0.118 | 0.000 | 0.878 | 0.002 | 0.001 |
| 11_Hum6      | cluster 1 | 0.130 | 0.000 | 0.868 | 0.001 | 0.001 |
| 08_Hum8      | cluster 1 | 0.074 | 0.000 | 0.925 | 0.001 | 0.001 |
| 02_Hum2      | cluster 2 | 0.000 | 0.000 | 0.001 | 0.998 | 0.001 |
| 02_Hum3      | cluster 2 | 0.000 | 0.000 | 0.001 | 0.997 | 0.001 |
| 04_Hum1      | cluster 2 | 0.007 | 0.000 | 0.002 | 0.990 | 0.001 |
| 04_Hum2      | cluster 2 | 0.004 | 0.000 | 0.002 | 0.992 | 0.002 |
| 04_Hum3      | cluster 2 | 0.060 | 0.000 | 0.001 | 0.938 | 0.001 |
| 06_Feed1     | cluster 2 | 0.005 | 0.000 | 0.002 | 0.991 | 0.001 |
| 08_Environ1  | cluster 2 | 0.083 | 0.000 | 0.006 | 0.905 | 0.005 |
| 10_Poultry   | cluster 2 | 0.044 | 0.001 | 0.003 | 0.951 | 0.002 |
| 02_Swine1    | cluster 2 | 0.000 | 0.000 | 0.001 | 0.997 | 0.001 |
| 99_Environ   | cluster 2 | 0.116 | 0.000 | 0.007 | 0.874 | 0.003 |
| 06_Hum1      | cluster 2 | 0.019 | 0.000 | 0.003 | 0.976 | 0.001 |
| SARB26       | cluster 2 | 0.044 | 0.001 | 0.004 | 0.951 | 0.001 |
| 07_Hum1      | cluster 2 | 0.055 | 0.000 | 0.004 | 0.937 | 0.003 |
| 98_Reptile   | cluster 2 | 0.001 | 0.000 | 0.003 | 0.994 | 0.003 |
| 00_Reptile   | cluster 2 | 0.000 | 0.000 | 0.001 | 0.997 | 0.002 |
| 02_Swine2    | cluster 2 | 0.000 | 0.000 | 0.001 | 0.997 | 0.001 |
| 06_Bovine    | cluster 2 | 0.033 | 0.000 | 0.003 | 0.962 | 0.002 |
| Kauffman1    | cluster 2 | 0.061 | 0.000 | 0.003 | 0.933 | 0.002 |
| 08_Environ2  | cluster 2 | 0.082 | 0.001 | 0.006 | 0.901 | 0.010 |
| 04_Hum5      | cluster 2 | 0.103 | 0.000 | 0.012 | 0.881 | 0.004 |
| 02_Hum4      | cluster 2 | 0.002 | 0.000 | 0.001 | 0.996 | 0.001 |
| 07_Hum4      | cluster 2 | 0.001 | 0.000 | 0.001 | 0.998 | 0.001 |
| 08_Hum3      | cluster 2 | 0.053 | 0.000 | 0.007 | 0.938 | 0.001 |
| 08_Hum5      | cluster 2 | 0.000 | 0.000 | 0.001 | 0.997 | 0.001 |
| 10_Hum6      | cluster 2 | 0.054 | 0.000 | 0.004 | 0.940 | 0.002 |
| 07_Hum5      | cluster 2 | 0.002 | 0.001 | 0.001 | 0.994 | 0.002 |
| 09_Hum5      | cluster 2 | 0.000 | 0.000 | 0.001 | 0.997 | 0.001 |
| 02_Hum1      | cluster 3 | 0.034 | 0.000 | 0.001 | 0.003 | 0.962 |
| 12_Hum1      | cluster 3 | 0.000 | 0.000 | 0.001 | 0.001 | 0.998 |
| 12_Hum2      | cluster 3 | 0.000 | 0.000 | 0.001 | 0.001 | 0.998 |
| 09_Plant     | cluster 3 | 0.000 | 0.000 | 0.001 | 0.001 | 0.997 |
| 09_Bovine1   | cluster 3 | 0.077 | 0.000 | 0.004 | 0.005 | 0.915 |
| 04_Swine     | cluster 3 | 0.071 | 0.000 | 0.001 | 0.005 | 0.923 |
| 06_Environ   | cluster 3 | 0.115 | 0.001 | 0.003 | 0.006 | 0.875 |
| 85_Hum*      | cluster 3 | 0.124 | 0.001 | 0.006 | 0.426 | 0.444 |
| 05_Feed      | cluster 3 | 0.046 | 0.000 | 0.001 | 0.002 | 0.950 |
| 06_Hum3      | cluster 3 | 0.019 | 0.000 | 0.001 | 0.001 | 0.978 |
| 00_Hum1      | cluster 3 | 0.082 | 0.000 | 0.003 | 0.004 | 0.911 |
| Kauffman3    | cluster 3 | 0.030 | 0.001 | 0.005 | 0.006 | 0.959 |
| 03_Hum1      | cluster 3 | 0.082 | 0.000 | 0.002 | 0.002 | 0.913 |
| 08_Hum6      | cluster 3 | 0.059 | 0.000 | 0.002 | 0.002 | 0.936 |
| 08_Hum7      | cluster 3 | 0.072 | 0.000 | 0.001 | 0.003 | 0.923 |
| 09_Hum1      | cluster 3 | 0.006 | 0.000 | 0.001 | 0.001 | 0.992 |
| 11_Hum4      | cluster 3 | 0.043 | 0.000 | 0.001 | 0.001 | 0.954 |
| 99_Hum       | cluster 3 | 0.031 | 0.000 | 0.002 | 0.001 | 0.965 |
| 11_Feed      | cluster 3 | 0.005 | 0.000 | 0.001 | 0.001 | 0.993 |
| 00_Hum2      | cluster 3 | 0.034 | 0.001 | 0.001 | 0.002 | 0.962 |
| 06_Swine     | cluster 4 | 0.089 | 0.852 | 0.013 | 0.016 | 0.029 |
| 08_Swine     | cluster 4 | 0.001 | 0.998 | 0.000 | 0.000 | 0.001 |
| 09_Environ1  | cluster 4 | 0.001 | 0.998 | 0.000 | 0.000 | 0.001 |
| 11_Hum5      | cluster 4 | 0.068 | 0.928 | 0.001 | 0.002 | 0.001 |
| 09_Swine     | cluster 4 | 0.003 | 0.995 | 0.000 | 0.001 | 0.000 |
| 04_Food*     | cluster 5 | 0.203 | 0.465 | 0.002 | 0.186 | 0.144 |
| 09_Environ2* | cluster 6 | 0.001 | 0.687 | 0.004 | 0.228 | 0.080 |
| 09_Hum4*     | cluster 6 | 0.001 | 0.687 | 0.006 | 0.196 | 0.109 |

| Distant lineage |           |       |       |
|-----------------|-----------|-------|-------|
| Strain ID       | Cluster   | Fst_1 | Fst_2 |
| 08_Food         | cluster 7 | 0.000 | 1.000 |
| 05_Swine1       | cluster 7 | 0.001 | 0.999 |
| 07_Swine1       | cluster 7 | 0.001 | 0.999 |
| 07_Swine2       | cluster 7 | 0.001 | 0.999 |
| 07_Feed         | cluster 7 | 0.000 | 1.000 |
| 09_Bovine2      | cluster 7 | 0.000 | 1.000 |
| 09_Hum2         | cluster 7 | 0.001 | 0.999 |
| 10_Environ      | cluster 8 | 1.000 | 0.000 |
| 06_Feed2        | cluster 8 | 1.000 | 0.000 |
| 07_Poultry      | cluster 8 | 1.000 | 0.000 |
| 02_Poultry      | cluster 8 | 1.000 | 0.000 |
| 05_Poultry2     | cluster 8 | 1.000 | 0.000 |
| 10_Swine        | cluster 8 | 1.000 | 0.000 |
| 08_Hum4         | cluster 8 | 0.999 | 0.001 |
| 00_Hum3         | cluster 8 | 0.999 | 0.001 |
