# Supplementary material for: WGS based study of the population structure of Salmonella enterica serovar Infantis
Source: PubMed Central journal article supplement (PMC6858691; doi:10.1186/s12864-019-6260-6), 2019-11-15

Figure S1

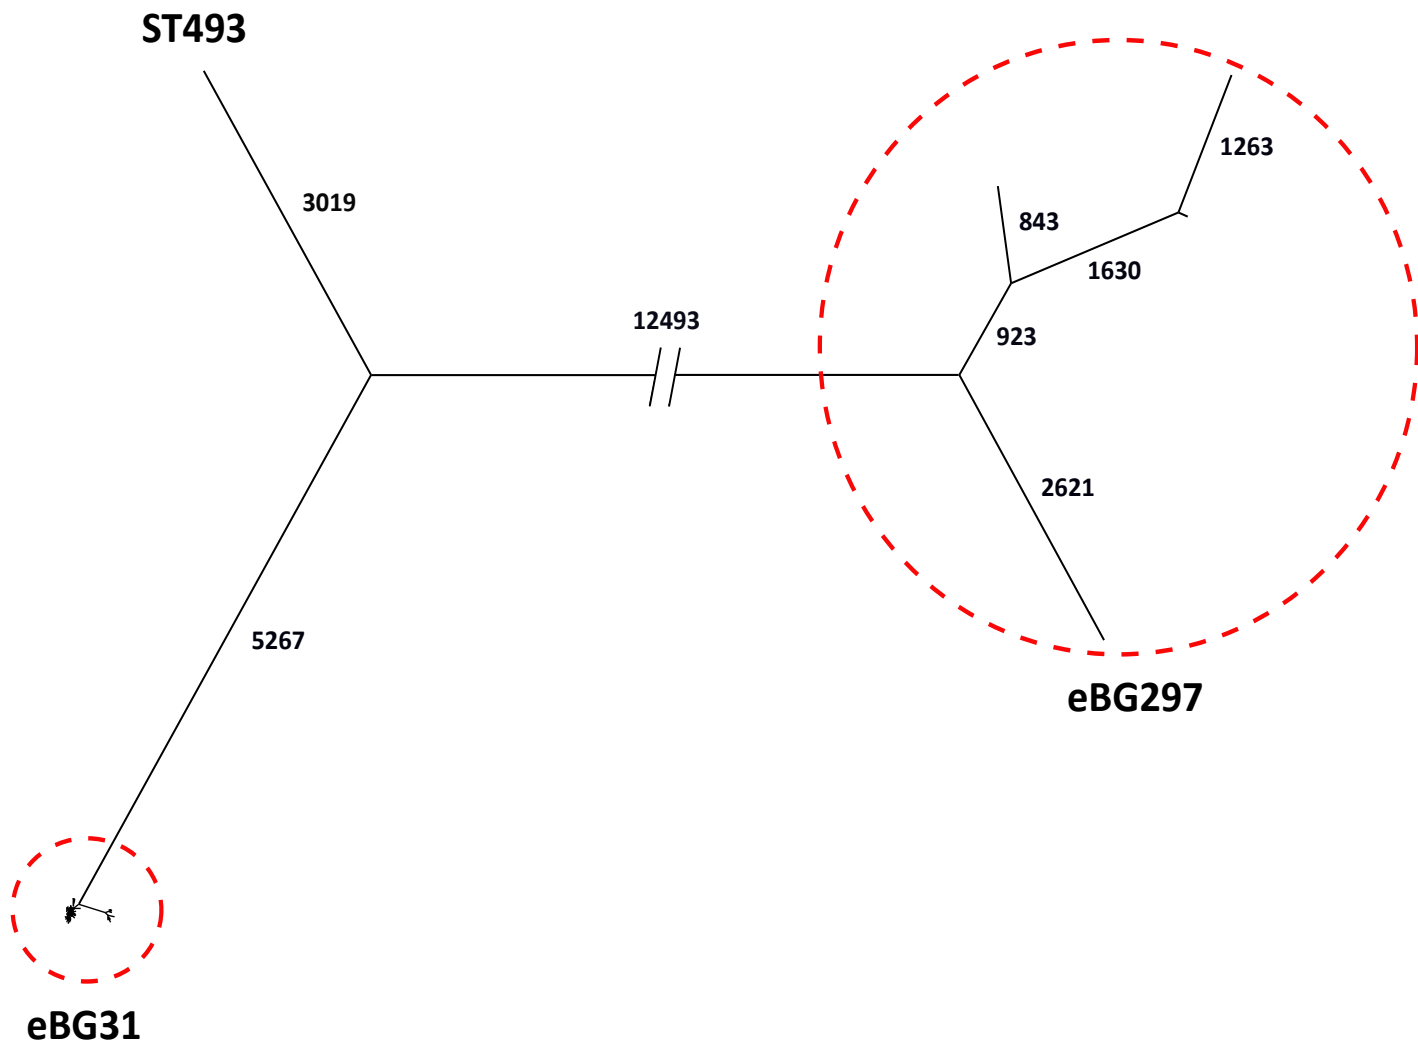

Figure S2

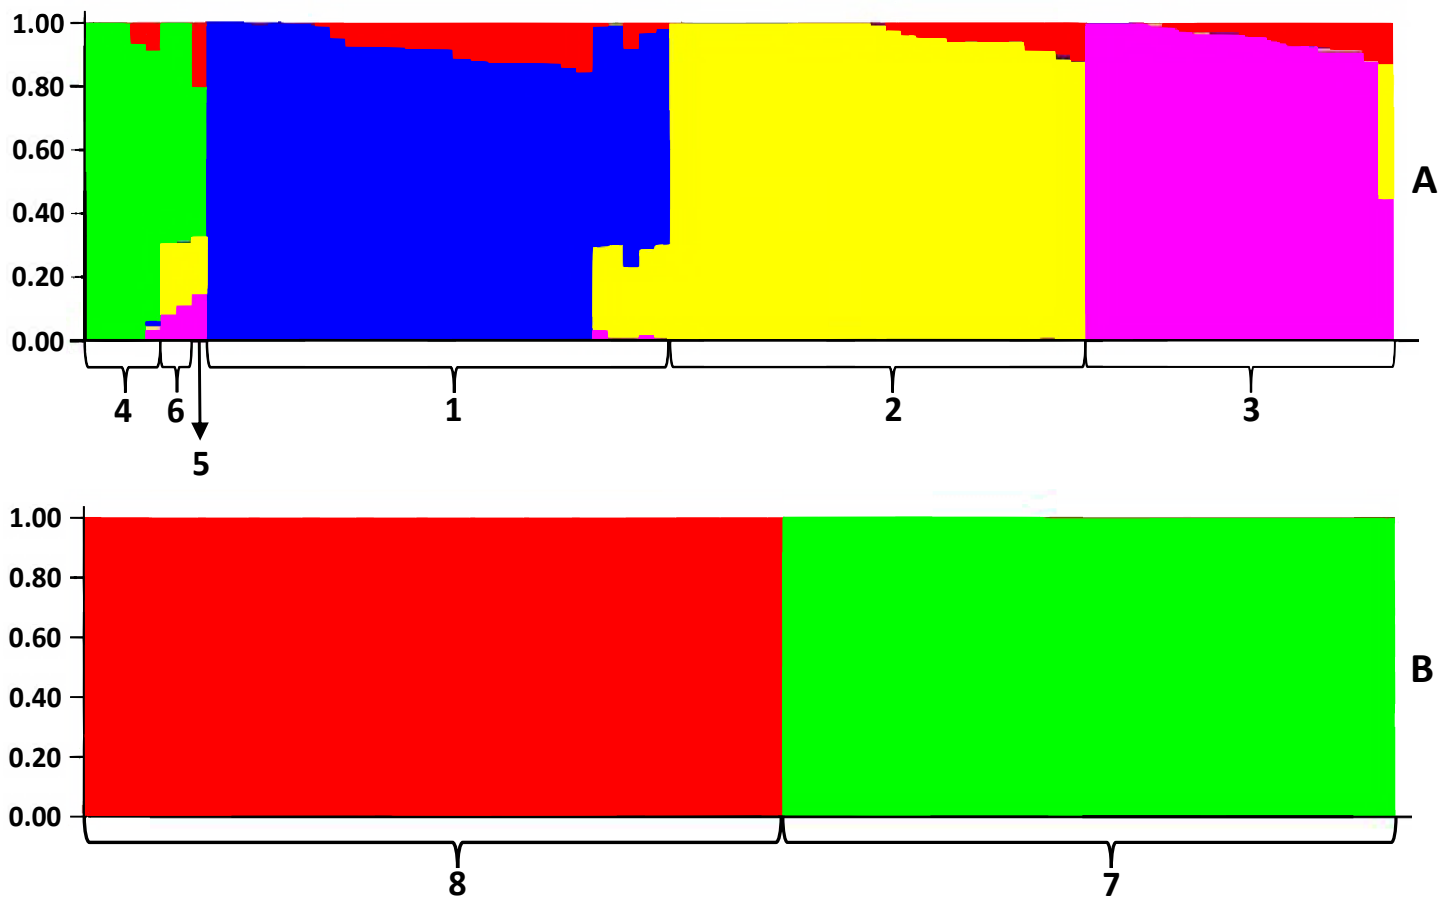

Figure S3

- Cluster 1
- Cluster 2
- Cluster 3
- Cluster 4
- Cluster 5
- Cluster 6
- Cluster 7
- Cluster 8

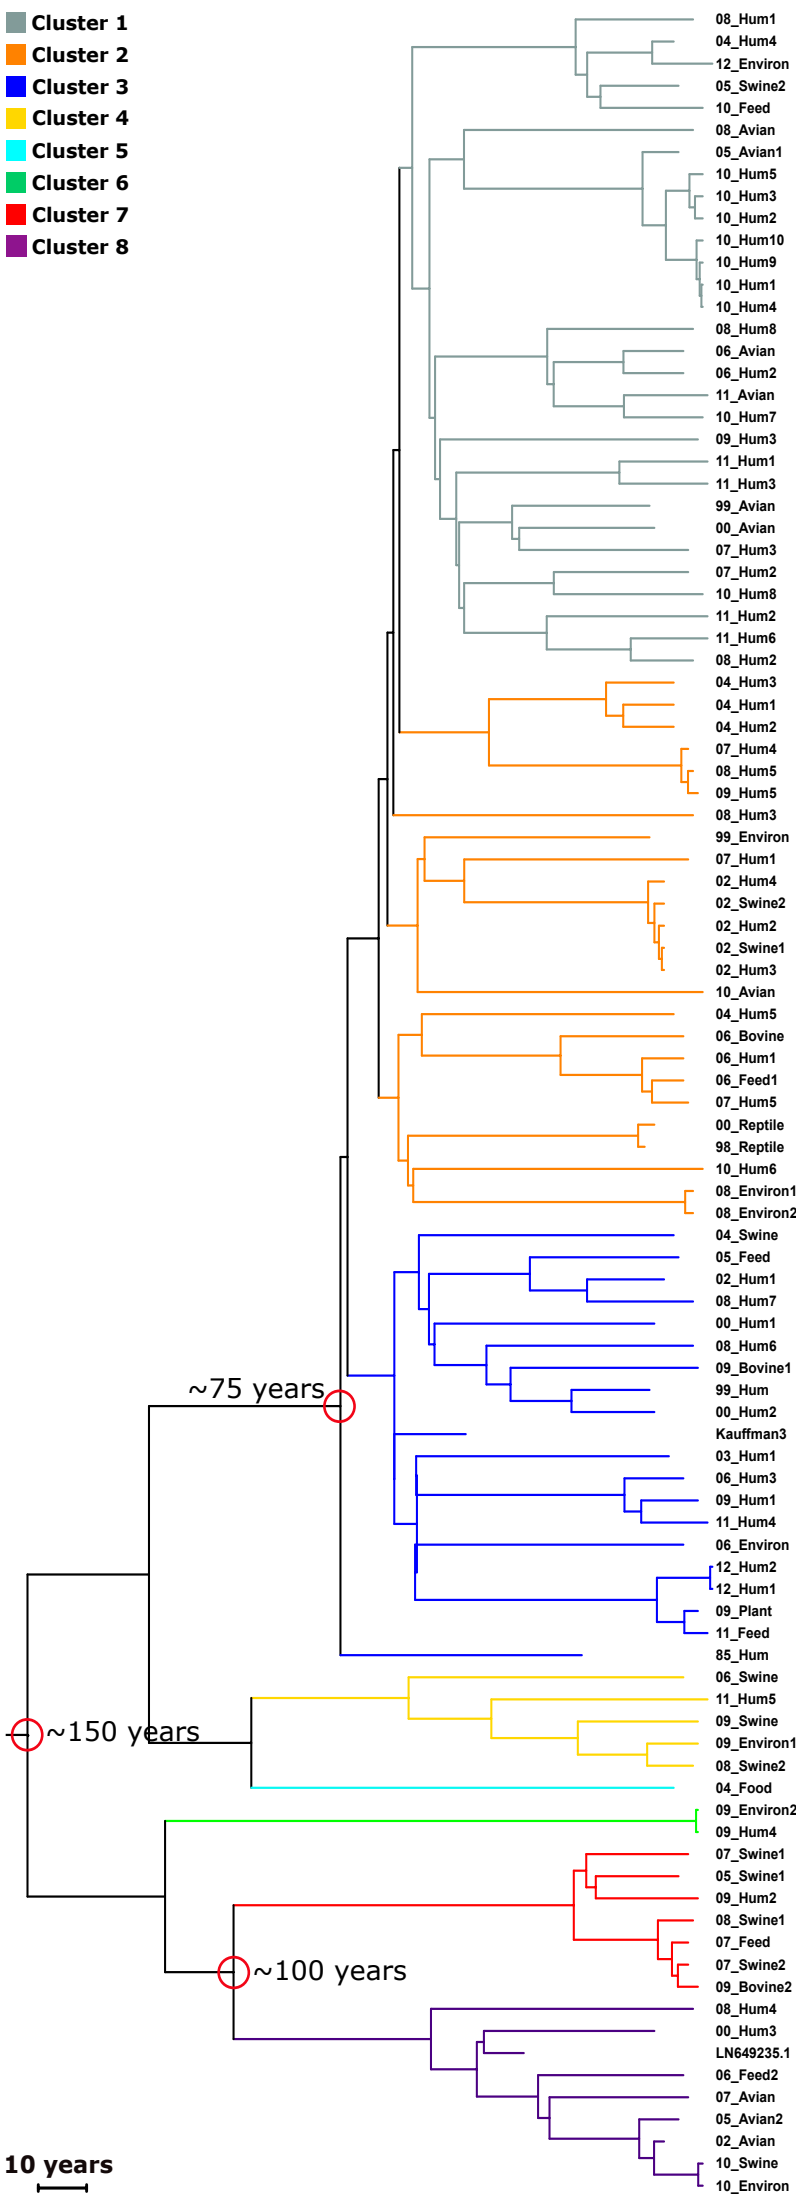

Figure S4

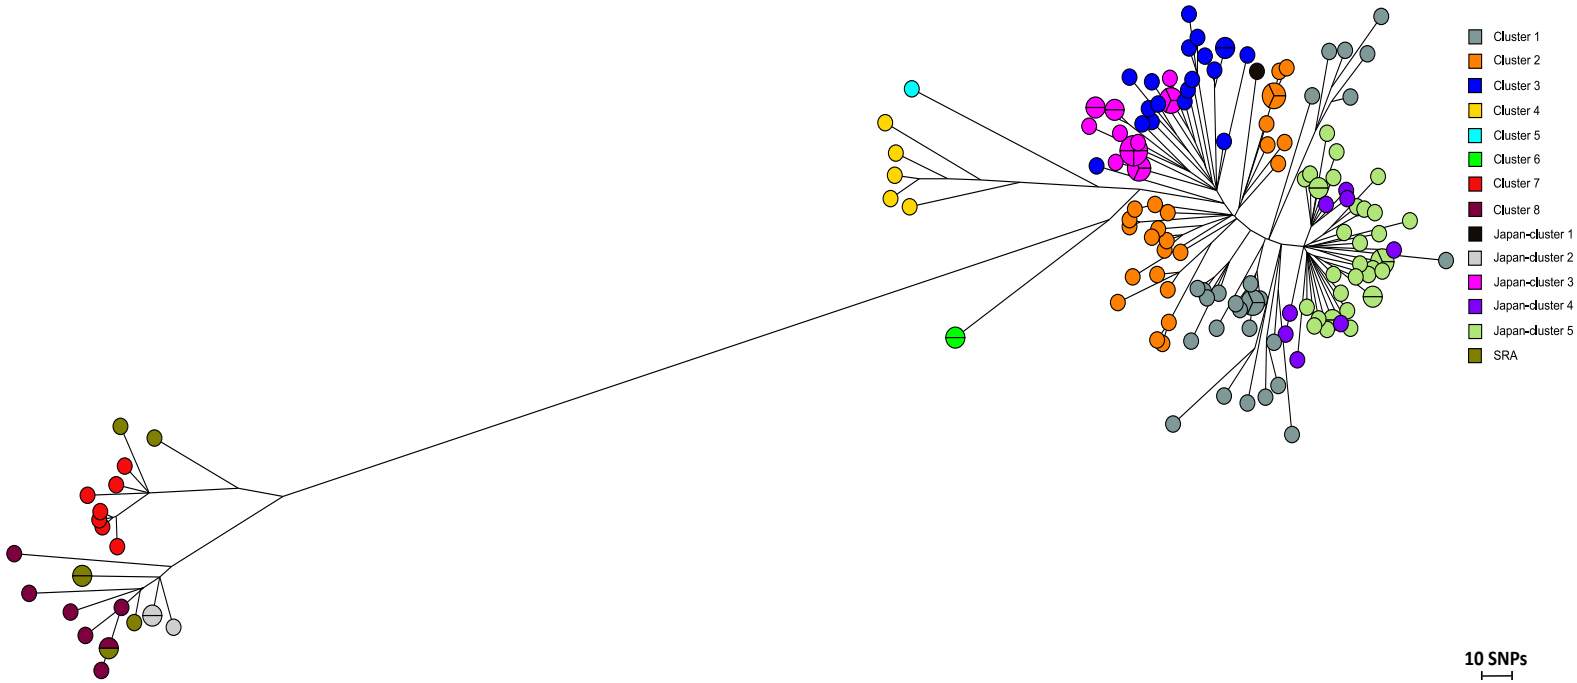

Figure S5

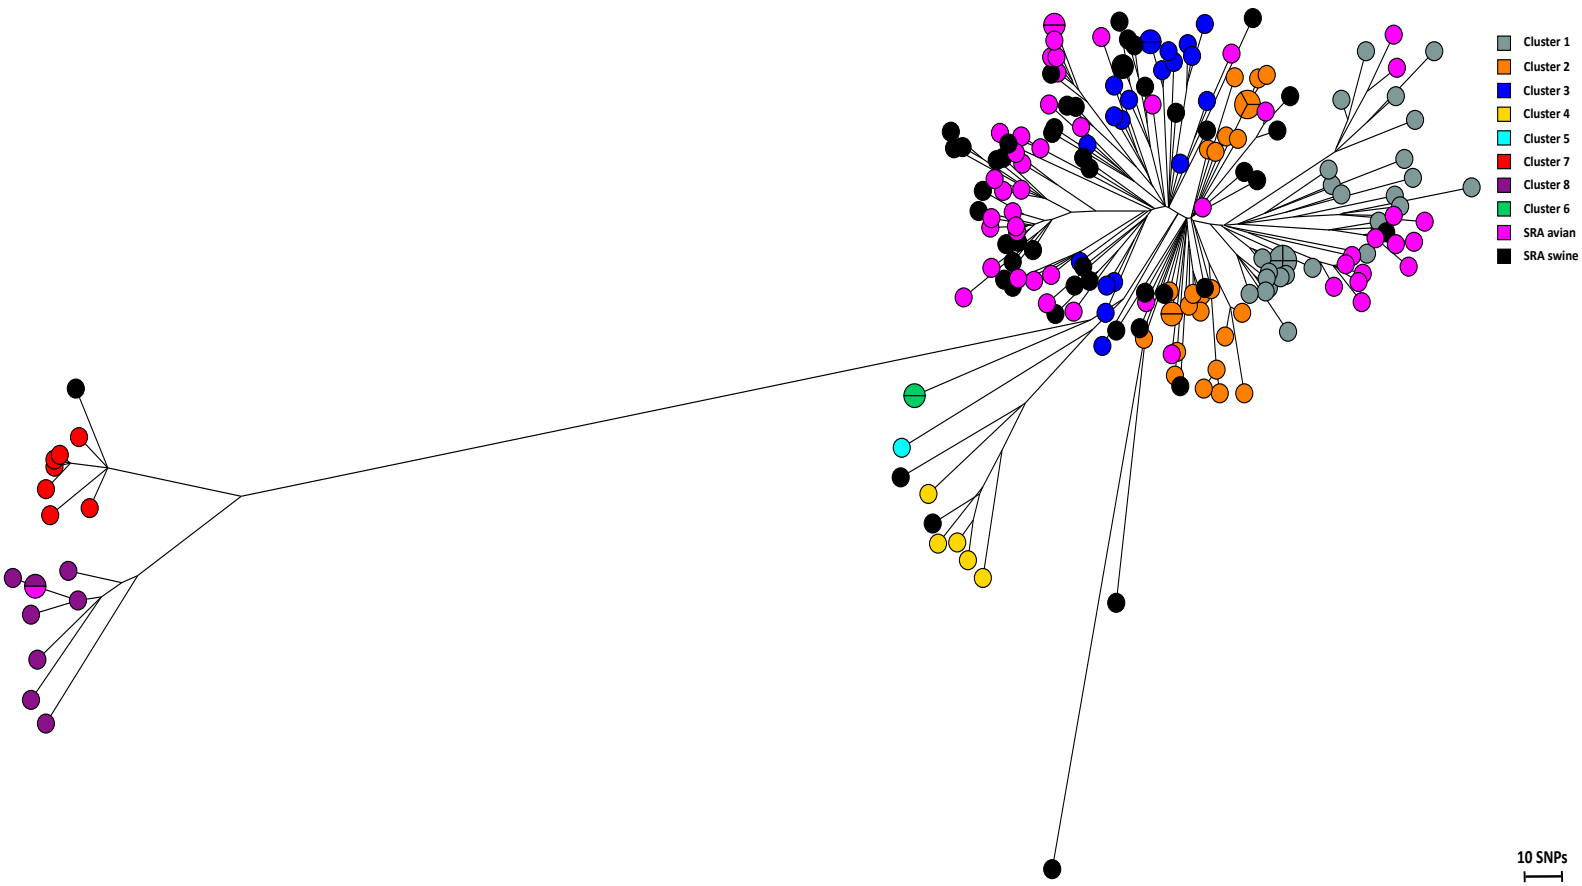

Figure S6

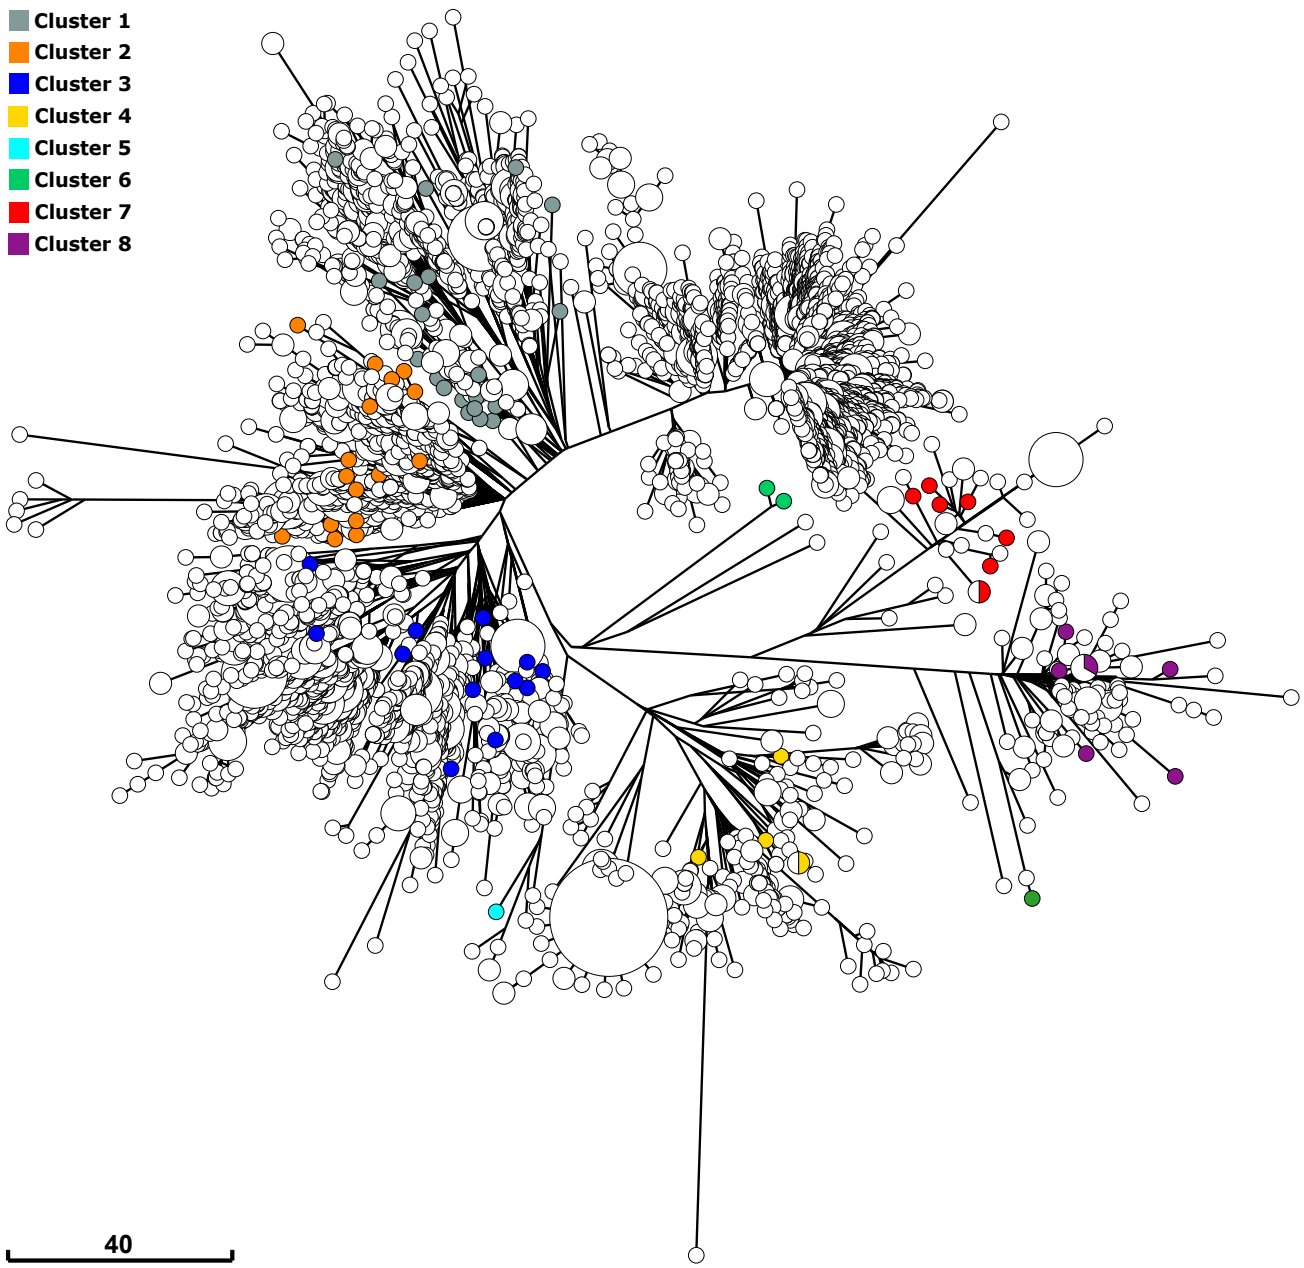

Supplement: 12864_2019_6260_MOESM2_ESM.pdf [file 12864_2019_6260_MOESM2_ESM.pdf]
